# Supplementary material for: Revised estimate of particulate emissions from Indonesian peatfires in 2015
Source: Copernicus journal article supplement (doi:10.5194/acp-2019-323), 2019-04-29
Supplement: Supplementary file 1 [file acp-2019-323-supplement.pdf]

**Table S1: Chemistry and Physics options used in WRF-chem**

|                              |             |                                               |
|------------------------------|-------------|-----------------------------------------------|
| Physics options              |             |                                               |
| Microphysics                 | Thompson    | (Thompson et al., 2008)                       |
| Longwave/Shortwave radiation | RRTMG       | (Iacono et al., 2008)                         |
| Land Surface Physics         | NOAH        |                                               |
| Planetary Boundary layer     | MYNN 2.5    | (Nakanishi and Niino, 2006)                   |
| Cumulus parameterizations    | GRELL 3D    | (Grell, 2002)                                 |
| Chemistry Options            |             |                                               |
| Gas-phase chemistry          | MOZART      | (Emmons et al., 2010)                         |
| Aerosols                     | MOSAIC      | (Zaveri et al., 2008)                         |
| Anthropogenic Emissions      | EDGAR-HTAP2 | (Janssens-Maenhout et al., 2015) <sup>2</sup> |
| Biogenic Emissions           | MEGAN       | (Guenther et al., 2006)                       |
|                              |             |                                               |

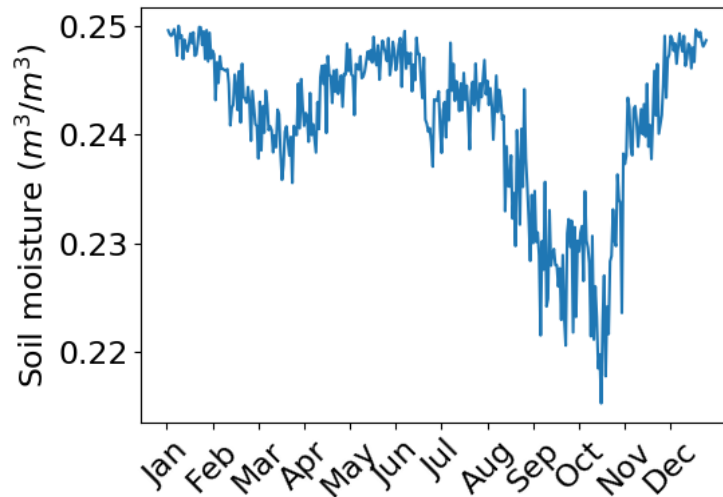

**Figure S1: Daily average soil moisture for peat across the study area (95-120°E and 10°S-10°N) for 2015.**

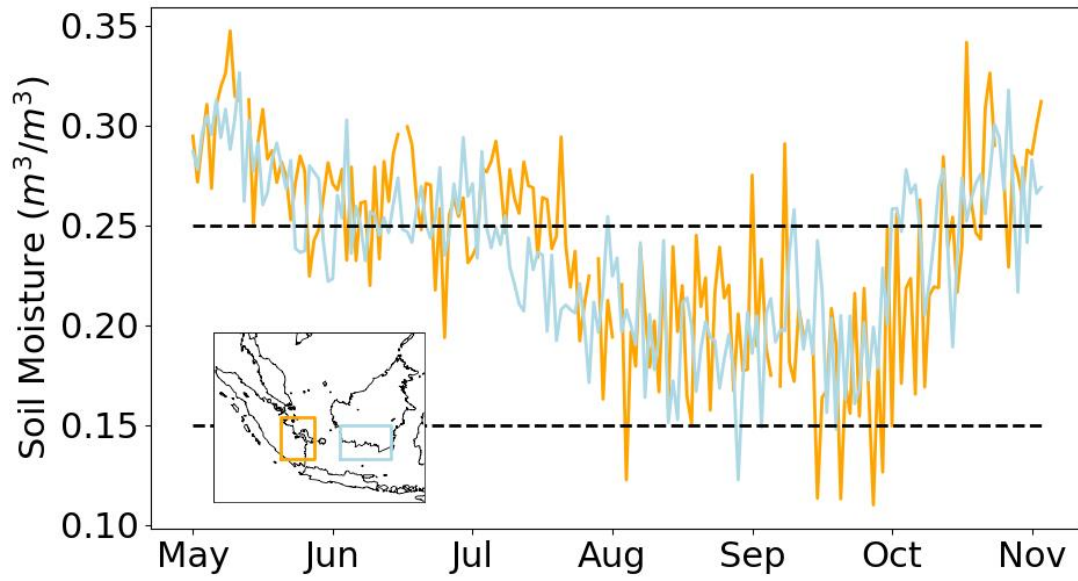

Figure S2: Soil moisture over high fire peatland regions (shown inset). The upper and lower soil moisture limits used to calculate depth are shown by the dotted lines.

**Equation S1**

Fractional bias, FB, is defined by

$$FB = \frac{1}{N} \sum \frac{(M_i - O_i)}{(M_i + O_i)/2}$$

Where N is the number of pairs of modelled (M) and observed (O) values.

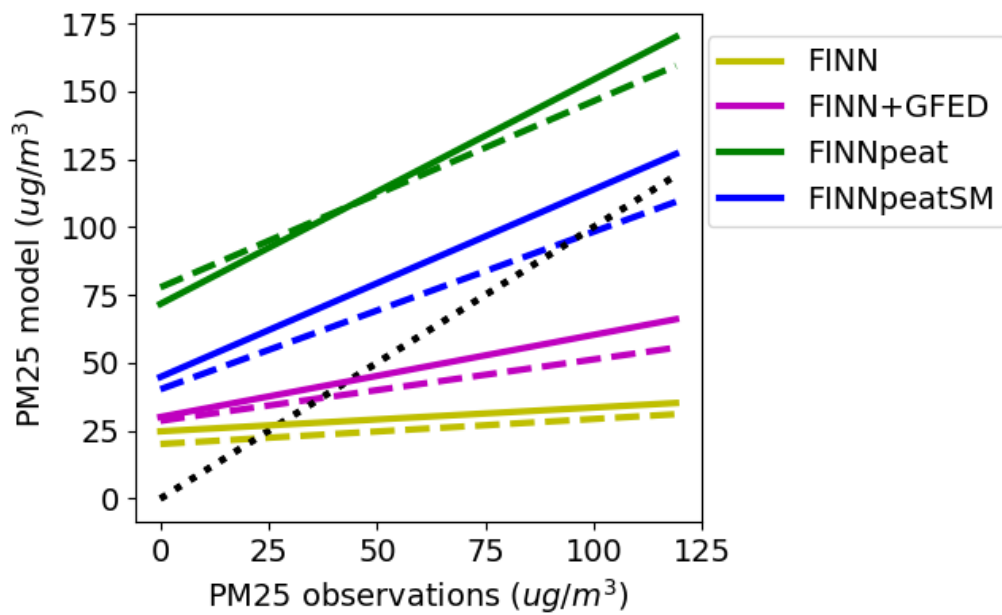

Figure S3: 24 hour mean PM<sub>2.5</sub> from observations and model simulations with different fire emissions datasets and injection options. Solid lines are simulations with surface injections, dashed lines and simulations with boundary layer injection. 1:1 relationship shown by black dotted line.

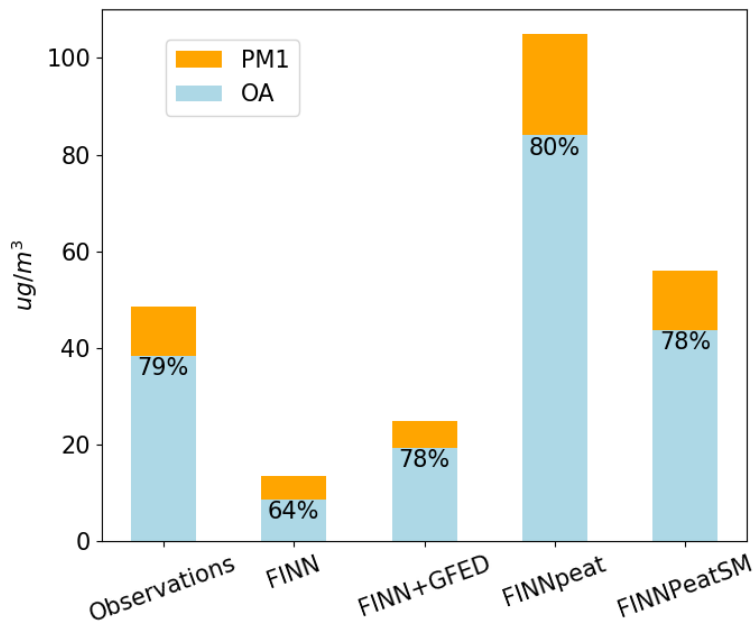

Figure S4: Average PM<sub>1</sub> and OA in Singapore for October 10<sup>th</sup>-31<sup>st</sup>, for observations and WRF-chem runs with the boundary layer injection option and different fire emissions datasets. The percentage contribution of OA to PM<sub>1</sub> is shown on each bar. PM<sub>1</sub> observations are a sum of Cl, NH<sub>4</sub>, NO<sub>3</sub>, SO<sub>4</sub> and OA. PM<sub>1</sub> from the model is NH<sub>4</sub>, NO<sub>3</sub>, SO and OA.

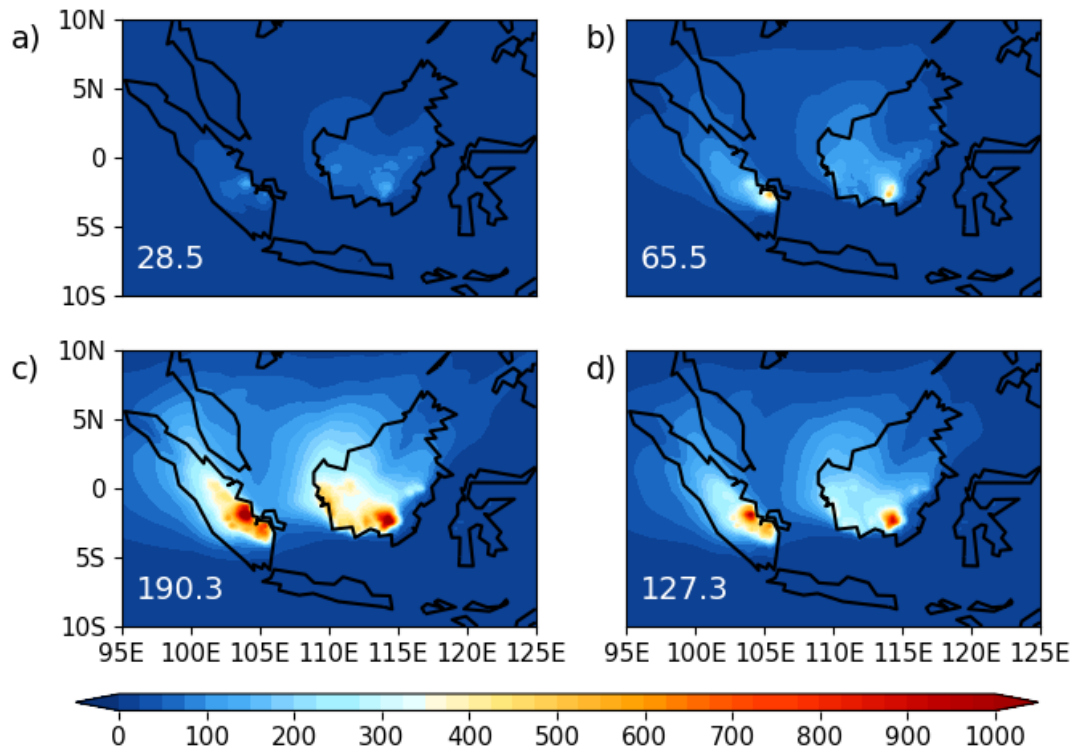

**Figure S5: Mean model surface PM<sub>2.5</sub> concentration (µg m<sup>-3</sup>) from fires for Sep-Oct 2015 with the boundary layer injection and (a) FINN emissions, (b) FINN+GFEDpeat, (c) FINNpeat and (d) FINNpeatSM. On each plot is the surface PM<sub>2.5</sub> from fires averaged over Sumatra and Borneo for September and October**

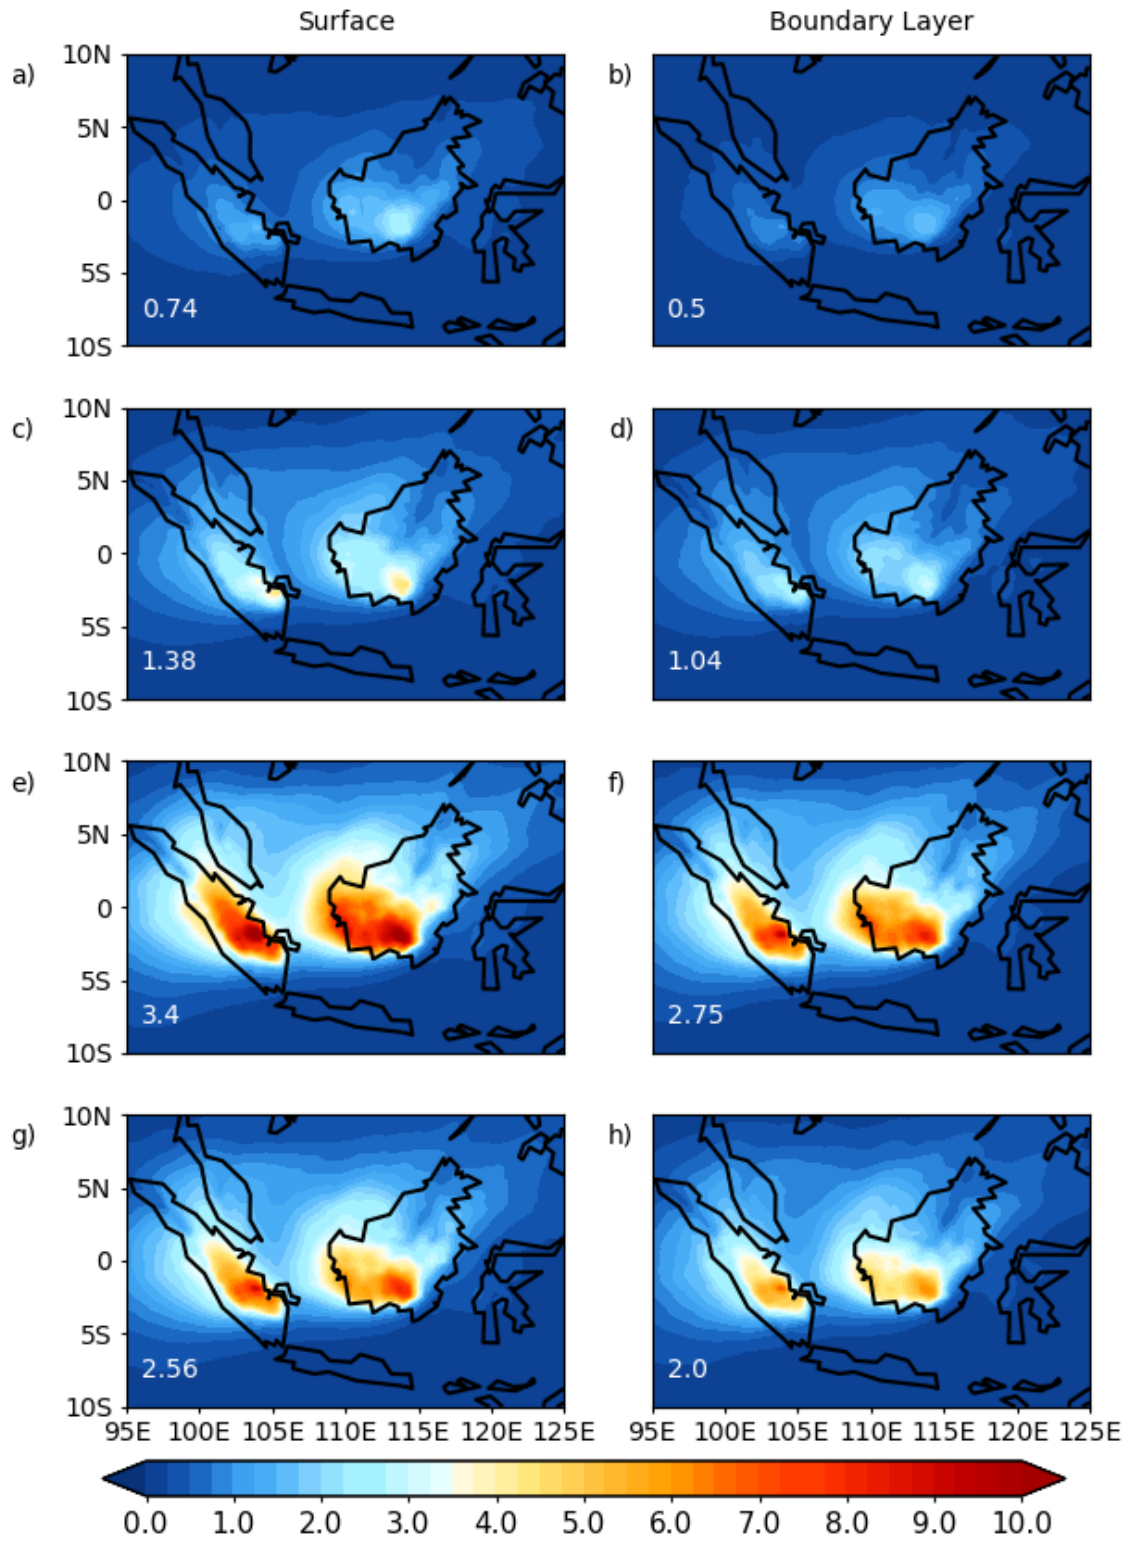

Figure S6: Mean AOD from fires for Sep-Oct 2015 with the surface (a,c,e,g) and boundary layer injection (b,d,f,h) and FINN emissions (a-b), FINN+GFEDpeat (c-d), FINNpeat (e-f) and FINNpeatSM (g-h). On each plot is the average AOD from fires for September and October.
